# Supplementary material
Source: Elsevier journal article supplement (https://www.sciencedirect.com/science/article/pii/S1888989118300363)
Supplement: mmc1 [file S1888989118300363:mmc1.docx]

**Material Suplementario**

**Correlaciones de Pearson entre citocinas y las dimensiones clínicas/ dominios cognitivos**

|  | IL-2 (pg/mL) | IL-1β (pg/mL) |
| --- | --- | --- |
|  | SZ (n=73) | SZ (n=73) |
| *Subgrupos:* | PEP (n=44) / ECT (n=29) | PEP (n=44) / ECT (n=29) |
| PANSS Total | **0.345****  **0.395**** / NS | **0.375****  **0.400**** / NS |
| Positiva | 0.241*  NS / 0.399* | 0.251*  NS / **0.501**** |
| Negativa | 0.268*  **0.438**** / NS | **0.337****  **0.529**** / NS |
| Negativa Factor Marder | **0.315****  **0.426**** / NS | **0.386****  **0.514**** / NS |
| Psicopatología General | **0.315****  0.329* / NS | **0.314****  NS / NS |
| CAINS |  |  |
| CAINS - MAP | **0.341****  0.388* / NS | 0.241*  0.332* / NS |
| CAINS - EXP | NS  0.308* / NS | 0.284*  **0.497** /** NS |
| CDS | 0.259*  NS / **0.557**** | NS |
| PSP | **-0.448****  **-0.542**** / NS | **-0.392****  **-0.404**** / -0.379* |
| *MCCB dominios cognitivos (T-scorea):* | |  |
| Velocidad de procesamiento | NS  -0.357* / NS | NS |
| Atención y vigilancia | NS | NS  NS / 0.470* |
| Memoria de trabajo | NS  -0.324* / NS | NS  -0.347* / NS |
| Aprendizaje visual | NS  **-0.423**** / NS | NS  -0.331* / NS |
| Cognición social | NS  - 0.374* / NS | NS |

Sólo se muestran correlaciones con p < 0.05 * and p < 0.01 **. NS = p ≥ 0.05; PEP, primer episodio psicótico (0-5 años de evolución); ECT, estadio crónico temprano (6-10 años); PANSS, Escala del Síndrome Positivo y Negativo; CAINS, Entrevista de Evaluación Clínica para el Síndrome Negativo; MAP, Motivación y Placer; EXP, Expresión; CDS, Escala de Depresión de Calgary; PSP, Escala del Funcionamiento Personal y Social; MCCB, Batería Cognitiva del Consenso MATRICS. No se detectó ninguna asociación para otras citocinas.
